# Supplementary material for: Functional Characterization of 21 Rare Allelic CYP1A2 Variants Identified in a Population of 4773 Japanese Individuals by Assessing Phenacetin O-Deethylation
Source: MDPI journal article supplement (doi:10.3390/jpm11080690), 2021-07-22
Supplement: s1 [file s1]

## **Supplementary Materials**

Functional Characterization of 21 Rare Allelic CYP1A2 Variants Identified in a Population of 4773 Japanese Individuals by Assessing Phenacetin O-deethylation

Masaki Kumondai, Evelyn Marie Gutiérrez Rico, Eiji Hishinuma, Yuya Nakanishi, Shuki Yamazaki, Akiko Ueda, Sakae Saito, Shu Tadaka, Kengo Kinoshita, Daisuke Saigusa, Tomoki Nakayoshi, Akifumi Oda, Noriyasu Hirasawa, and Masahiro Hiratsuka

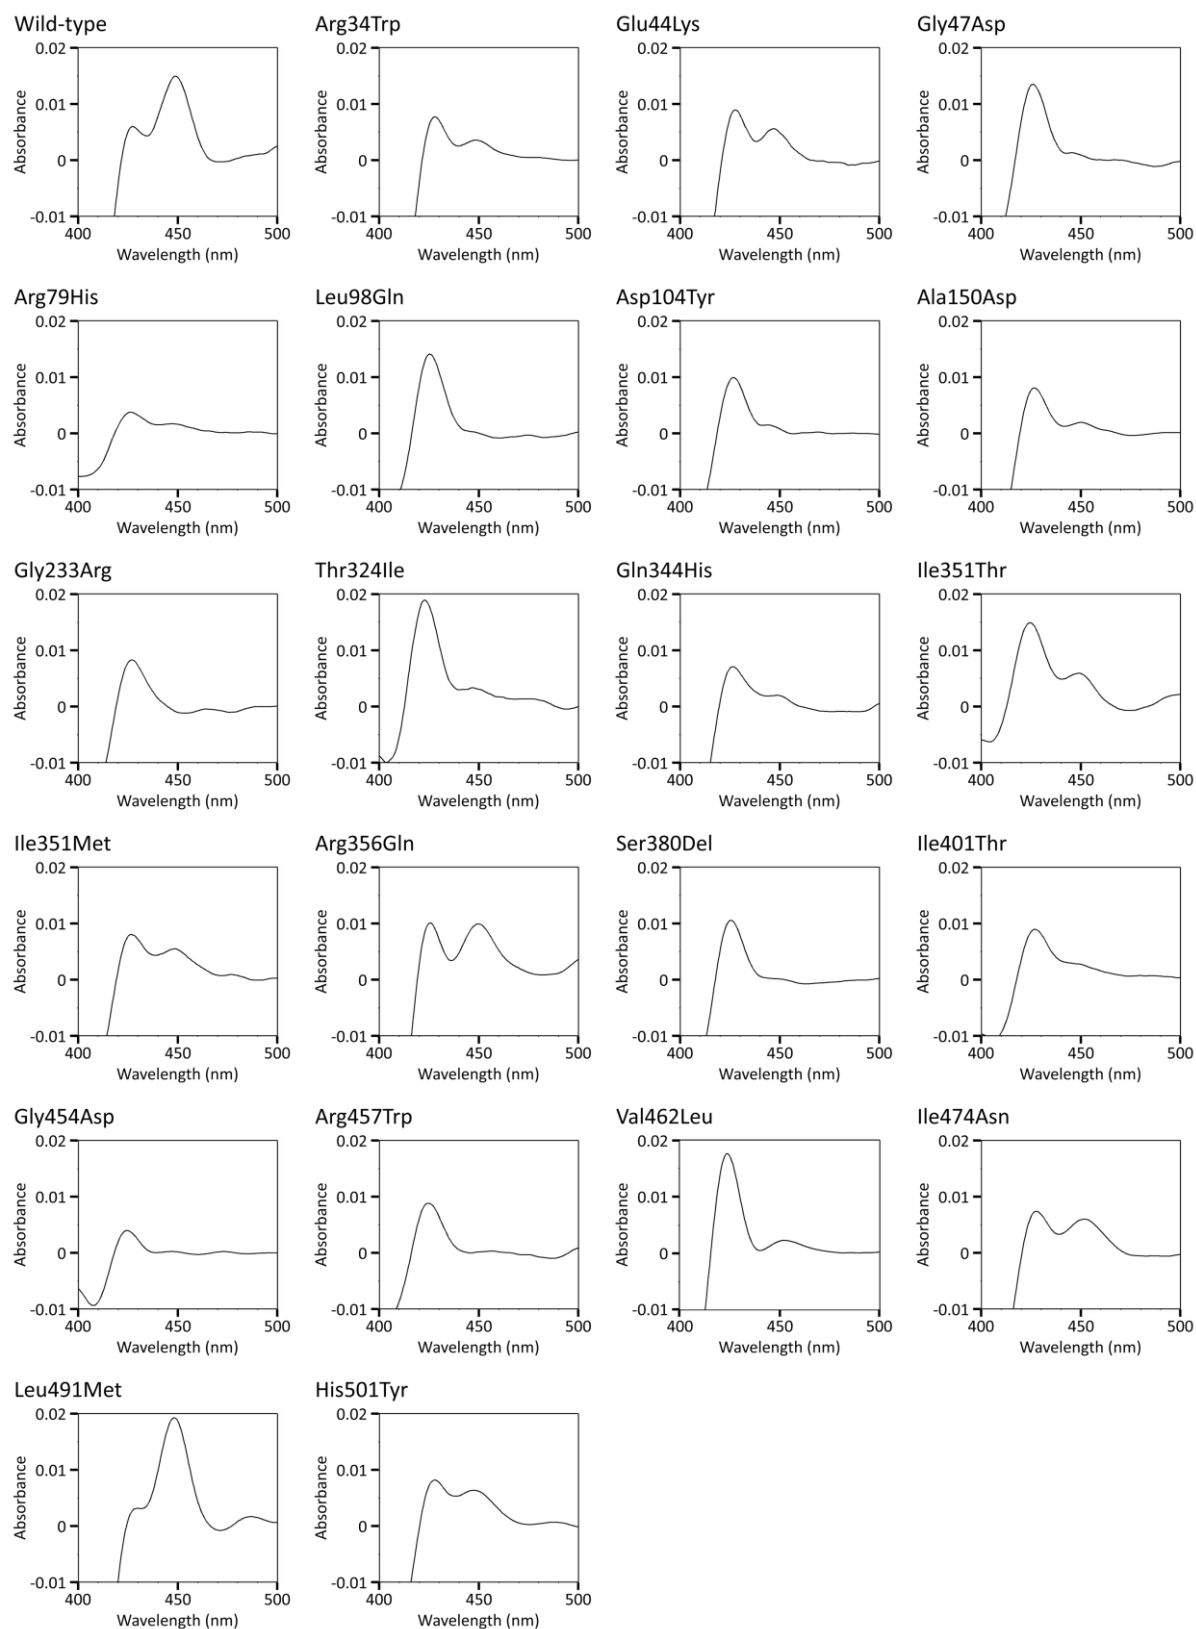

**Supplementary Figure S1.** Representative CO-difference spectra of CYP1A2 variant proteins expressed in 293FT cells. All assays and measurements were performed in triplicate using a single microsomal preparation. Mock 1 represents transfection with 10  $\mu$ g mock plasmid. Mock 2 represents transfection with 9.6  $\mu$ g mock plasmid, 0.2  $\mu$ g CPR plasmid, and 0.2  $\mu$ g cytochrome  $b_5$  plasmid.

**Supplementary Table S1.** PCR primers used to amplify sequences of the human *CYP1A2* gene.

| Exon | Size (bp) | Forward primer (5'-3') | Reverse primer (5'-3') |
|------|-----------|------------------------|------------------------|
| 2    | 1203      | GGAATCTTGAGGCTCCTTTCC  | TCCAGGTCACACAGCTGGTC   |
| 3    | 432       | AGACCAAGTTGGGAGGATAGG  | AGGACTTTGCTGTTTCTCCAC  |
| 4-5  | 707       | GGCCAGAGAAAGCTAATGCTG  | GATCTGTGGGGAACGAGGTC   |
| 6    | 344       | TTCTACCTCTTCCCTGTTCC   | TAGCAATTGAGGTCCCCTCC   |
| 7    | 439       | GGTCCCATCTCCTCTGTTCC   | CCTGCACTTGGCTAAAGCTG   |
